# Supplementary material for: Enhanced piezoelectric performance of lead-based ceramics via multi-B site ion design and local structural disorder
Source: Royal Society of Chemistry journal article supplement (doi:10.1039/d5ta09824f), 2026-01-01
Supplement: d5ta09824f1.pdf [file d5ta09824f1.pdf]

# Enhanced Piezoelectric Performance of Lead-based Ceramics via multi-B Site Ions Design and Local Structural Disorder

Wei Peng<sup>a,b,c,\*</sup>, Zhengran Chen<sup>a,b</sup>, Chenming Gu<sup>a,b,d</sup>, ZiAo Xing<sup>a,b,d</sup>, Bing Wang<sup>c</sup>,  
Ruihong Liang<sup>a,b,\*</sup>

<sup>a</sup>State Key Laboratory of High Performance Ceramics, Shanghai Institute of Ceramics, Chinese Academy of Sciences, Shanghai, 201800, China

<sup>b</sup>Key Laboratory of Inorganic Functional Materials and Devices, Shanghai Institute of Ceramics, Chinese Academy of Sciences, Shanghai 201800, China

<sup>c</sup>Institute for Advanced Study, Shenzhen University, Shenzhen 518060, China

<sup>d</sup>Center of Materials Science and Optoelectronics Engineering, University of Chinese Academy of Sciences, 19 Yuquan Road, Shijinshan District, Beijing 100049, China

\*Corresponding authors.

Email addresses:

pengwei@mail.sic.ac.cn (Wei Peng);

liangruihong@mail.sic.ac.cn (Ruihong Liang)

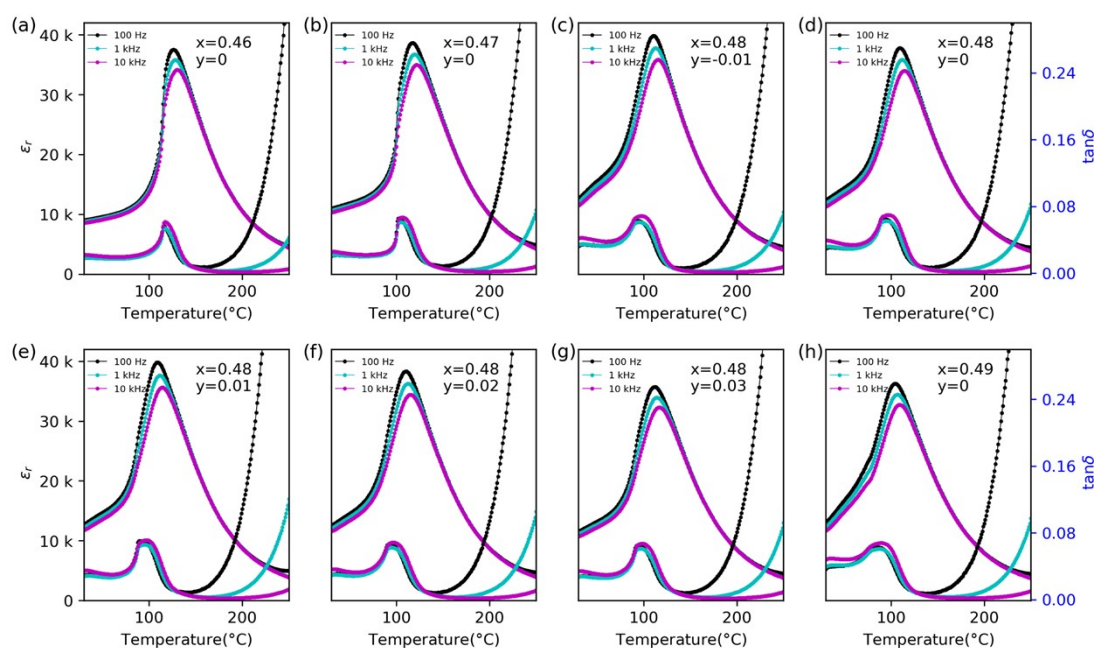

Figure S1: The temperature dependence of  $\epsilon_r$  and  $\tan\delta$  of PNN-PMcN-PT ceramics at 0.1-10 kHz with  $x=0.46-0.49$  and  $y=-0.01-0.03$
